# Supplementary material
Source: publisher figshare collection journal article supplement (https://sage.figshare.com/ndownloader/files/31566807)
Supplement: Supplementary file 1 [file 31566807]

**Inter-Item Correlation Matrix**

|    | Q1    | Q2    | Q3    | Q4    | Q5    | Q6    | Q7    | Q8    |
|----|-------|-------|-------|-------|-------|-------|-------|-------|
| Q1 | 1.000 | .648  | .591  | .604  | .498  | .411  | .537  | .555  |
| Q2 | .648  | 1.000 | .620  | .684  | .553  | .484  | .580  | .557  |
| Q3 | .591  | .620  | 1.000 | .664  | .602  | .507  | .595  | .603  |
| Q4 | .604  | .684  | .664  | 1.000 | .689  | .487  | .678  | .635  |
| Q5 | .498  | .553  | .602  | .689  | 1.000 | .412  | .573  | .542  |
| Q6 | .411  | .484  | .507  | .487  | .412  | 1.000 | .495  | .558  |
| Q7 | .537  | .580  | .595  | .678  | .573  | .495  | 1.000 | .711  |
| Q8 | .555  | .557  | .603  | .635  | .542  | .558  | .711  | 1.000 |
